# Supplementary material
Source: PubMed Central journal article supplement (PMC10023291)
Supplement: NIHMS1846079-supplement-supinfo.pdf [file NIHMS1846079-supplement-supinfo.pdf]

## SUPPLEMENTAL MATERIALS

**Supplemental Table 1. Study Characteristics of Health ABC and CHS**

|                                                                                  | <b>Health ABC</b>                                                                                                                                                                                                                                                                                                                                                                                                                                                                                                                                                                                       | <b>CHS</b>                                                                                                                                                                                                                                                                                                                                                                                                                                                                                                                                                                                                   |
|----------------------------------------------------------------------------------|---------------------------------------------------------------------------------------------------------------------------------------------------------------------------------------------------------------------------------------------------------------------------------------------------------------------------------------------------------------------------------------------------------------------------------------------------------------------------------------------------------------------------------------------------------------------------------------------------------|--------------------------------------------------------------------------------------------------------------------------------------------------------------------------------------------------------------------------------------------------------------------------------------------------------------------------------------------------------------------------------------------------------------------------------------------------------------------------------------------------------------------------------------------------------------------------------------------------------------|
| <b>Recruitment and Enrollment of Parent Cohort, Inclusion/Exclusion Criteria</b> | <ul style="list-style-type: none"> <li>• Adults 70-79 years old</li> <li>• Recruited from random sample of White and all Black beneficiaries residing in Memphis, TN, and Pittsburgh, PA</li> <li>• Non-institutionalized, well-functioning adults with self-reported ability to walk ¼ mile or climb 10 steps without rest; without difficulty with activities of daily living, obvious cognitive impairment, or communicating with interviewer; expected to remain in community for next ≥3 years; and not receiving active treatment for cancer</li> <li>• Enrolled in 1997-1998 (n=3075)</li> </ul> | <ul style="list-style-type: none"> <li>• Adults 65 years and older</li> <li>• Recruited from age-stratified random sample of Medicare-eligible adults from Sacramento County, CA, Washington County, MD, Forsyth County, NC, Pittsburgh County, PA</li> <li>• Non-institutionalized, community-dwelling adults, not wheelchair-bound at home; able to attend an in-person examination; expected to remain in community for next ≥3 years; and not receiving active treatment for cancer</li> <li>• Initial cohort recruited in 1989-90 (n=5201), followed by a predominantly Black cohort (n=687)</li> </ul> |
| <b>Study Sample</b>                                                              | <ul style="list-style-type: none"> <li>• Participants who completed DXA or CT of the spine in 1997-1998, were free of prevalent heart failure and oral steroid use, and had available covariates</li> <li>• Study baseline: 1997-1998</li> <li>• Sample size: DXA (n=2835); CT (n=1365)</li> </ul>                                                                                                                                                                                                                                                                                                      | <ul style="list-style-type: none"> <li>• Participants who returned to the 1994-1995 examination, completed DXA, were free of prevalent heart failure and oral steroid use, and had available covariates</li> <li>• Study baseline: 1994-1995</li> <li>• Sample size (n=1268)</li> </ul>                                                                                                                                                                                                                                                                                                                      |
| <b>DXA Measurement / Primary Exposures</b>                                       | <ul style="list-style-type: none"> <li>• Areal BMD of total hip and femoral neck</li> <li>• QDR 4500A densitometer, Hologic, Inc, Waltham, MA</li> </ul>                                                                                                                                                                                                                                                                                                                                                                                                                                                | <ul style="list-style-type: none"> <li>• Areal BMD of total hip and femoral neck</li> <li>• QDR 2000 densitometer, Hologic, Inc, Bedford, MA</li> </ul>                                                                                                                                                                                                                                                                                                                                                                                                                                                      |
| <b>CT Measurement / Primary Exposure</b>                                         | <ul style="list-style-type: none"> <li>• Volumetric trabecular BMD of lumbar spine</li> <li>• General Electric 9800 Advantage CT scanner (GE Medical Systems, Milwaukee, WI)</li> </ul>                                                                                                                                                                                                                                                                                                                                                                                                                 | <ul style="list-style-type: none"> <li>• Not performed</li> </ul>                                                                                                                                                                                                                                                                                                                                                                                                                                                                                                                                            |
| <b>Follow-up Evaluation</b>                                                      | <ul style="list-style-type: none"> <li>• Semi-annual contacts consisting of telephone interviews or in-person examinations for follow-up evaluations and events surveillance</li> </ul>                                                                                                                                                                                                                                                                                                                                                                                                                 | <ul style="list-style-type: none"> <li>• Semi-annual contacts consisting of telephone interviews or in-person examinations for follow-up evaluations and events surveillance</li> </ul>                                                                                                                                                                                                                                                                                                                                                                                                                      |
| <b>Heart Failure Assessment</b>                                                  | <ul style="list-style-type: none"> <li>• Potential events reviewed for centralized adjudication</li> <li>• Diagnosis based on physician report of heart failure and</li> </ul>                                                                                                                                                                                                                                                                                                                                                                                                                          | <ul style="list-style-type: none"> <li>• Potential events reviewed by adjudication committee</li> <li>• Diagnosis based on physician report of heart failure and supportive</li> </ul>                                                                                                                                                                                                                                                                                                                                                                                                                       |

|                   |                                                                                                                                                                                                                                                                                                                                                                                                                                                                                                                                                                                                                                        |                                                                                                                                                                                                                                                                                                                                                                                                                                                                                                                                                                                                                                                               |
|-------------------|----------------------------------------------------------------------------------------------------------------------------------------------------------------------------------------------------------------------------------------------------------------------------------------------------------------------------------------------------------------------------------------------------------------------------------------------------------------------------------------------------------------------------------------------------------------------------------------------------------------------------------------|---------------------------------------------------------------------------------------------------------------------------------------------------------------------------------------------------------------------------------------------------------------------------------------------------------------------------------------------------------------------------------------------------------------------------------------------------------------------------------------------------------------------------------------------------------------------------------------------------------------------------------------------------------------|
|                   | <p>supportive symptoms and signs; imaging findings; or treatment.</p> <ul style="list-style-type: none"> <li>• HF subtypes assigned based on imaging information proximate to event</li> <li>• End of follow-up: 2012</li> </ul>                                                                                                                                                                                                                                                                                                                                                                                                       | <p>symptoms and signs; imaging findings; or treatment.</p> <ul style="list-style-type: none"> <li>• HF subtypes assigned based on imaging information proximate to event</li> <li>• End of follow-up: 2014</li> </ul>                                                                                                                                                                                                                                                                                                                                                                                                                                         |
| <b>Covariates</b> | <ul style="list-style-type: none"> <li>• Questionnaire: age, sex, race, smoking, alcohol, physical activity, medication use</li> <li>• Physical examination: height, weight, waist circumference, blood pressure</li> <li>• Self-reported medical history: prevalent CHD, stroke/TIA, HF, PAD</li> <li>• Electrocardiography/Medicare Claims: prevalent atrial fibrillation or flutter</li> <li>• Laboratory: glucose, lipid fractions, cystatin C; 25-hydroxyvitamin D and phosphate (subset); CRP, IL-6, TNF-<math>\alpha</math></li> <li>• Spirometry: FEV<sub>1</sub></li> <li>• Centralized adjudication: incident CHD</li> </ul> | <ul style="list-style-type: none"> <li>• Questionnaire: age, sex, race, smoking, alcohol, physical activity, medication use</li> <li>• Physical examination: height, weight, waist circumference, blood pressure</li> <li>• Self-reported medical history and medical record review, plus adjudication of interval events between enrollment and study baseline: prevalent CHD, stroke/TIA, HF, PAD</li> <li>• Electrocardiography/Medicare Claims: prevalent atrial fibrillation or flutter</li> <li>• Laboratory: glucose, lipid fractions, cystatin C;</li> <li>• Spirometry: FEV<sub>1</sub></li> <li>• Centralized adjudication: incident CHD</li> </ul> |

CHD, coronary heart disease; CRP, C-reactive protein; CT, computed tomography; DXA, dual-energy X-ray absorptiometry; FEV<sub>1</sub>, forced expiratory volume in 1 second; HF, heart failure; IL-6, interleukin 6; PAD, peripheral arterial disease; TIA, transient ischemic attack; TNF- $\alpha$ , tumor necrosis factor  $\alpha$ ;

**Supplemental Table 2. Sex- and Race-Stratified Baseline Characteristics of the Health ABC Cohort and CHS Combined**

| Characteristics                                                       | Women             |                  |            | Men               |                  |            |
|-----------------------------------------------------------------------|-------------------|------------------|------------|-------------------|------------------|------------|
|                                                                       | White<br>(n=1393) | Black<br>(n=819) | P<br>Value | White<br>(n=1292) | Black<br>(n=599) | P<br>Value |
| Age, years                                                            | 74.7 ± 3.7        | 73.5 ± 3.4       | <0.001     | 74.9 ± 3.9        | 73.7 ± 3.2       | <0.001     |
| Education, n (%)                                                      |                   |                  |            |                   |                  |            |
| Less than high school                                                 | 158 (11)          | 299 (37)         | <0.001     | 173 (13)          | 287 (48)         | <0.001     |
| High school graduation                                                | 538 (39)          | 284 (35)         | <0.001     | 320 (25)          | 142 (24)         | <0.001     |
| More than high school                                                 | 696 (50)          | 232 (29)         | <0.001     | 797 (62)          | 169 (28)         | <0.001     |
| Body mass index, kg/m <sup>2</sup>                                    | 26.1 ± 4.6        | 29.6 ± 5.6       | <0.001     | 26.9 ± 3.7        | 27 ± 4.2         | 0.535      |
| Waist circumference, cm                                               | 94.7 ± 13.3       | 101 ± 14.7       | <0.001     | 100.8 ± 11.3      | 98.5 ± 12.3      | <0.001     |
| Smoking, n (%)                                                        |                   |                  | 0.004      |                   |                  | <0.001     |
| Never smoker                                                          | 800 (57)          | 443 (54)         |            | 390 (30)          | 179 (30)         |            |
| Former smoker                                                         | 478 (34)          | 272 (33)         |            | 831 (64)          | 296 (50)         |            |
| Current smoker                                                        | 115 (8)           | 103 (13)         |            | 69 (5)            | 123 (21)         |            |
| Heavy alcohol use, n (%)                                              | 123 (9)           | 17 (2)           | <0.001     | 96 (8)            | 31 (5)           | 0.072      |
| Physical activity, kcal/wk                                            | 1127 ± 1637       | 608 ± 991        | <0.001     | 1849 ± 2450       | 1061 ± 2017      | <0.001     |
| Systolic blood pressure, mm Hg                                        | 134 ± 20          | 139 ± 22         | <0.001     | 132.4 ± 19.6      | 138.4 ± 22.1     | <0.001     |
| Antihypertensive medication, n (%)                                    | 653 (46.9)        | 553 (67.5)       | <0.001     | 613 (47.4)        | 315 (52.6)       | 0.038      |
| Prevalent diabetes, n (%)                                             | 144 (10.3)        | 212 (25.9)       | <0.001     | 250 (19.3)        | 173 (28.9)       | <0.001     |
| Estrogen replacement therapy, n (%)                                   | 369 (26.5)        | 91 (11.1)        | <0.001     | NA                | NA               | NA         |
| Aspirin use, n (%)                                                    | 337 (24.2)        | 221 (27)         | 0.144      | 424 (32.8)        | 169 (28.2)       | 0.045      |
| Prevalent coronary heart disease                                      | 169 (12.1)        | 141 (17.2)       | <0.001     | 340 (26.3)        | 120 (20)         | 0.003      |
| Prevalent stroke/TIA, n (%)                                           | 79 (5.7)          | 67 (8.2)         | 0.022      | 96 (7.4)          | 53 (8.8)         | 0.287      |
| Prevalent peripheral artery disease                                   | 19 (1.4)          | 15 (1.8)         | 0.388      | 54 (4.2)          | 18 (3)           | 0.214      |
| Prevalent atrial fibrillation, n (%)                                  | 63 (4.5)          | 27 (3.3)         | 0.159      | 80 (6.2)          | 19 (3.2)         | 0.006      |
| Estimated glomerular filtration rate eGFR, mL/min/1.73 m <sup>2</sup> | 71 ± 18           | 74.3 ± 19        | <0.001     | 70 ± 17           | 76 ± 19          | <0.001     |
| Forced expiratory volume in 1 s, L                                    | 1.8 ± 0.4         | 1.7 ± 0.4        | <0.001     | 2.6 ± 0.6         | 2.3 ± 0.6        | <0.001     |
| C-reactive protein, mg/mL                                             | 3.6 ± 6.7         | 4.3 ± 5.2        | 0.010      | 2.8 ± 5.1         | 3.4 ± 5.2        | 0.027      |
| Interleukin-6, pg/mL                                                  | 2.3 ± 1.7         | 2.6 ± 2.1        | 0.012      | 2.7 ± 2           | 2.6 ± 2          | 0.658      |
| Tumor necrosis factor-α, pg/mL                                        | 3.4 ± 1.5         | 3.2 ± 1.7        | 0.022      | 3.7 ± 1.7         | 3.3 ± 1.9        | 0.001      |
| Calcium, mg/dL                                                        | 10 ± 0.5          | 10 ± 0.6         | 0.871      | 9.9 ± 0.5         | 9.8 ± 0.5        | 0.321      |
| Phosphate, mg/dL                                                      | 3.7 ± 0.4         | 3.7 ± 0.4        | 0.909      | 3.4 ± 0.4         | 3.5 ± 0.5        | <0.001     |
| 25-hydroxy vitamin D, ng/mL                                           | 28.9 ± 11.5       | 20.7 ± 11.5      | <0.001     | 29 ± 9.1          | 21.2 ± 8.4       | <0.001     |
| Parathyroid hormone, pg/mL                                            | 46.5 ± 22.6       | 64.9 ± 42.6      | 0.004      | 47 ± 22.4         | 58.3 ± 33.6      | 0.001      |
| Total hip BMD, g/cm <sup>2</sup>                                      | 0.747±0.130       | 0.858±0.151      | <0.001     | 0.938±0.149       | 1.018±0.157      | <0.001     |
| Femoral neck BMD, g/cm <sup>2</sup>                                   | 0.636±0.111       | 0.752±0.132      | <0.001     | 0.766±0.131       | 0.849±0.144      | <0.001     |
| Total hip, WHO categories\                                            |                   |                  | <0.001     |                   |                  | <0.001     |
| Normal, n (%)                                                         | 382 (27)          | 481 (59)         |            | 1013 (78)         | 539 (90)         |            |
| Osteopenia, n (%)                                                     | 729 (52)          | 285 (35)         |            | 258 (20)          | 58 (10)          |            |

|                              |          |          |        |          |          |        |
|------------------------------|----------|----------|--------|----------|----------|--------|
| Osteoporosis, n (%)          | 282 (20) | 53 (6)   |        | 21 (2)   | 2 (0.3)  |        |
| Femoral neck, WHO categories |          |          | <0.001 |          |          | <0.001 |
| Normal, n (%)                | 237 (17) | 429 (52) |        | 713 (55) | 469 (78) |        |
| Osteopenia, n (%)            | 836 (60) | 341 (42) |        | 532 (41) | 122 (20) |        |
| Osteoporosis, n (%)          | 320 (23) | 49 (6)   |        | 47 (4)   | 8 (1)    |        |

\*Data are given as mean  $\pm$  standard deviations for continuous variables and count (percent) for categorical variables. Comparisons between race groups are with t-tests or chi-square tests, as appropriate.

BMD, bone mineral density; eGFR, estimated glomerular filtration rate; TIA, transient ischemic attack; WHO, World Health Organization.

**Supplemental Table 3. Sex- and Race-Stratified Associations of DXA BMD Measures and Incident HF in Health ABC Presented per 0.1g/cm<sup>2</sup> Decrement**

|                                | Women |                             |     |                             | Men |                             |     |                             |
|--------------------------------|-------|-----------------------------|-----|-----------------------------|-----|-----------------------------|-----|-----------------------------|
|                                | n     | White<br>HR* (95% CI),<br>p | n   | Black<br>HR* (95% CI),<br>p | n   | White<br>HR* (95% CI),<br>p | n   | Black<br>HR* (95% CI),<br>p |
| <b><i>Total Hip BMD</i></b>    |       |                             |     |                             |     |                             |     |                             |
| Age-adjusted model             | 795   | 0.97(0.85-1.10),<br>0.622   | 671 | 1.15(1.02-1.30),<br>0.019   | 861 | 1.04(0.94-1.15),<br>0.488   | 508 | 0.90(0.80-1.02),<br>0.095   |
| Fully adjusted model†          | 739   | 0.89(0.77-1.04),<br>0.143   | 608 | 1.48(1.25-1.74),<br><0.001  | 799 | 1.07(0.95-1.21),<br>0.252   | 469 | 0.87(0.74-1.01),<br>0.061   |
| <b><i>Femoral Neck BMD</i></b> |       |                             |     |                             |     |                             |     |                             |
| Age-adjusted model             | 795   | 0.95(0.82-1.11),<br>0.540   | 671 | 1.13(0.99-1.30),<br>0.076   | 861 | 1.02(0.91-1.14),<br>0.786   | 508 | 0.96(0.84-1.10),<br>0.531   |
| Fully adjusted model†          | 739   | 0.88(0.75-1.04),<br>0.140   | 608 | 1.36(1.14-1.64),<br><0.001  | 799 | 1.06(0.93-1.20),<br>0.399   | 469 | 0.87(0.74-1.03),<br>0.102   |

BMD, bone mineral density; CI, confidence interval; DXA, dual-energy X-ray absorptiometry; HF, heart failure; HR, hazard ratio; QCT, quantitative computed tomography

\*Per 0.1g/cm<sup>2</sup> decrement of BMD

†Adjusted for age, body mass index, systolic blood pressure, antihypertensive medication use, diabetes, smoking status, heavy alcohol use, physical activity, estrogen use, prevalent coronary heart disease, prevalent stroke and transient ischemic attack, prevalent peripheral artery disease, prevalent atrial fibrillation, forced expiratory ventilation in 1 second, estimated glomerular filtrate rate.

**Supplemental Table 4. Sex- and Race-Stratified Relationships of DXA-derived BMD Measures and Incident HFpEF and HFrEF in Health ABC and CHS Combined**

|                                    | Women |                            |     |                            | Men  |                            |     |                            |
|------------------------------------|-------|----------------------------|-----|----------------------------|------|----------------------------|-----|----------------------------|
|                                    | n     | White<br>HR* (95% CI)<br>p | n   | Black<br>HR* (95% CI)<br>p | n    | White<br>HR* (95% CI)<br>p | n   | Black<br>HR* (95% CI)<br>p |
| <b>HFpEF</b>                       |       |                            |     |                            |      |                            |     |                            |
| <i>Cumulative Incidence, n (%)</i> |       | 147 (10.6)                 |     | 63 (7.7)                   |      | 107 (8.3)                  |     | 35 (5.8)                   |
| <b>Total Hip BMD</b>               |       |                            |     |                            |      |                            |     |                            |
| Age-adjusted model                 | 1393  | 0.84(0.74-0.96)<br>0.010   | 817 | 1.15(0.96-1.37)<br>0.13    | 1292 | 1.15(1.00-1.32)<br>0.040   | 599 | 0.88(0.71-1.09)<br>0.251   |
| Fully adjusted model†              | 1337  | 0.90(0.78-1.05)<br>0.179   | 754 | 1.60(1.25-2.05)<br><0.001  | 1230 | 1.21(1.04-1.41)<br>0.016   | 560 | 0.91(0.70-1.28)<br>0.454   |
| <b>Femoral Neck BMD</b>            |       |                            |     |                            |      |                            |     |                            |
| Age-adjusted model                 | 1393  | 0.82(0.71-0.95)<br>0.009   | 819 | 1.14(0.93-1.40)<br>0.204   | 1292 | 1.19(1.01-1.39)<br>0.034   | 599 | 0.95(0.75-1.20)<br>0.635   |
| Fully adjusted model†              | 1337  | 0.87(0.74-1.03)<br>0.113   | 756 | 1.41(1.09-1.84)<br>0.010   | 1230 | 1.28(1.07-1.54)<br>0.007   | 560 | 0.88(0.67-1.16)<br>0.362   |
| <b>HFrEF</b>                       |       |                            |     |                            |      |                            |     |                            |
| <i>Cumulative Incidence, n (%)</i> |       | 91 (6.5)                   |     | 73 (8.9)                   |      | 131 (10.1)                 |     | 67 (11.2)                  |
| <b>Total Hip BMD</b>               |       |                            |     |                            |      |                            |     |                            |
| Age-adjusted model                 | 1393  | 1.04(0.88-1.23)<br>0.64    | 819 | 1.12(0.95-1.32)<br>0.176   | 1292 | 1.04(0.92-1.17)<br>0.543   | 599 | 0.83(0.71-0.98)<br>0.024   |
| Fully adjusted model†              | 1337  | 0.96(0.79-1.17)<br>0.668   | 756 | 1.35(1.09-1.66)<br>0.006   | 1230 | 1.10(0.96-1.26)<br>0.190   | 560 | 0.73(0.60-0.88)<br>0.001   |
| <b>Femoral Neck BMD</b>            |       |                            |     |                            |      |                            |     |                            |
| Age-adjusted model                 | 1393  | 1.06(0.87-1.30)<br>0.549   | 819 | 1.08(0.90-1.30)<br>0.423   | 1292 | 1.01(0.88-1.15)<br>0.937   | 599 | 0.87(0.73-1.03)<br>0.103   |
| Fully adjusted model†              | 1337  | 0.98(0.79-1.23)<br>0.877   | 756 | 1.24(0.98-1.56)<br>0.077   | 1230 | 1.06(0.91-1.23)<br>0.482   | 560 | 0.76(0.62-0.92)<br>0.006   |

BMD, bone mineral density; CI, confidence interval; HR, hazard ratio; HFrEF, heart failure with preserved ejection fraction; HFpEF, heart failure with reduced ejection fraction

\*Per 0.1g/cm<sup>2</sup> decrement of BMD

†Adjusted for age, body mass index, systolic blood pressure, antihypertensive medication use, diabetes, smoking status, heavy alcohol use, physical activity, estrogen use, prevalent coronary heart disease, prevalent stroke and transient ischemic attack, prevalent peripheral artery disease, prevalent atrial fibrillation, forced expiratory ventilation in 1 second, estimated glomerular filtrate rate.

**Supplemental Table 5. Sensitivity Analyses: Sex- and Race-Stratified Relationships of DXA-Derived BMD Measures and Incident HF in Health ABC and CHS Combined Starting 2 Years After BMD Measurement or Adjusting for Time-Varying CHD**

|                                             | Women |                           |     |                            | Men  |                           |     |                           |
|---------------------------------------------|-------|---------------------------|-----|----------------------------|------|---------------------------|-----|---------------------------|
|                                             | n     | White                     | n   | Black                      | n    | White                     | n   | Black                     |
|                                             |       | HR* (95% CI)<br>p         |     | HR* (95% CI)<br>p          |      | HR* (95% CI)<br>p         |     | HR* (95% CI)<br>p         |
| <b>Start of follow-up 2 years after BMD</b> |       |                           |     |                            |      |                           |     |                           |
| <b>Total Hip BMD</b>                        |       |                           |     |                            |      |                           |     |                           |
| Fully adjusted model                        | 1087  | 0.92 (0.82-1.03)<br>0.124 | 414 | 1.38 (1.16-1.64)<br><0.001 | 1013 | 1.14 (1.04-1.25)<br>0.005 | 564 | 0.95 (0.81-1.12)<br>0.571 |
| <b>Femoral Neck BMD</b>                     |       |                           |     |                            |      |                           |     |                           |
| Fully adjusted model                        | 1087  | 0.91 (0.8-1.03)<br>0.14   | 414 | 1.22 (1.02-1.45)<br>0.032  | 1013 | 1.16 (1.04-1.29)<br>0.006 | 564 | 0.95 (0.8-1.14)<br>0.594  |
| <b>Accounting for interim CHD</b>           |       |                           |     |                            |      |                           |     |                           |
| <b>Total Hip BMD</b>                        |       |                           |     |                            |      |                           |     |                           |
| Fully adjusted model + time-varying CHD     | 1337  | 0.97 (0.88-1.08)<br>0.605 | 756 | 1.46 (1.26-1.70)<br>0.022  | 1230 | 1.15 (1.06-1.24)<br>0.001 | 560 | 0.82 (0.73-0.93)<br>0.003 |
| <b>Femoral Neck BMD</b>                     |       |                           |     |                            |      |                           |     |                           |
| Fully adjusted model + time-varying CHD     | 1337  | 0.94 (0.84-1.06)<br>0.311 | 756 | 1.29 (1.10-1.50)<br>0.001  | 1230 | 1.14 (1.04-1.24)<br>0.006 | 560 | 0.80 (0.69-0.91)<br>0.001 |

BMD, bone mineral density; CHD, coronary heart disease; CI, confidence interval; HR, hazard ratio
